# Supplementary material for: Anin vivomicrofluidic study of bacterial transit inC. elegansnematodes
Source: Royal Society of Chemistry journal article supplement (doi:10.1039/d0lc00064g), 2020-01-01
Supplement: d0lc00064g1.pdf [file d0lc00064g1.pdf]

**Supplementary information**

**An *in vivo* microfluidic study of bacterial transit in *C. elegans*  
nematodes**

**Vittorio Viri, Matteo Cornaglia, Huseyin Baris Atakan, Thomas Lehnert, Martin A. M. Gijs\***

Laboratory of Microsystems, Ecole Polytechnique Fédérale de Lausanne,  
CH-1015 Lausanne, Switzerland.

\*Author to whom correspondence should be addressed

E-mail: martin.gijs@epfl.ch

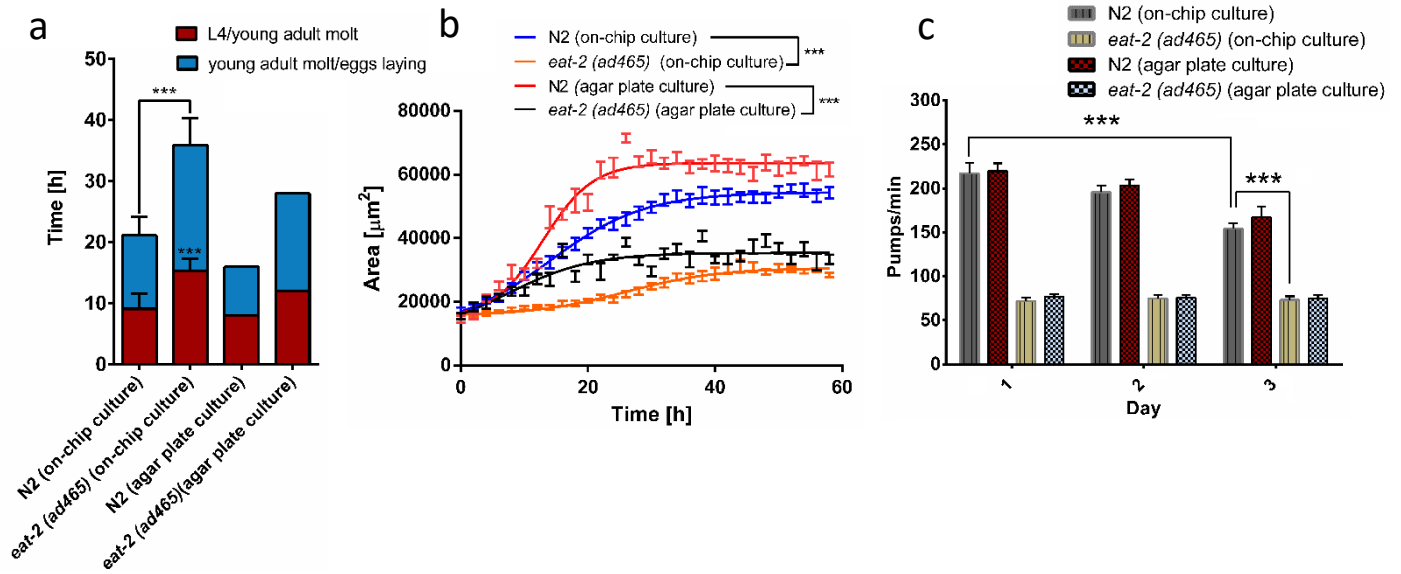

**Fig. S1 (Supplementary).** Monitoring of development parameters of N2 worms and *eat-2(ad465)* mutants for on-chip and agar plate culture. a) Development time of N2 worms and *eat-2(ad465)* mutants for two different stages from L4 to adulthood. Free-swimming worms have been maintained in the culture part of the microfluidic chamber and were continuously perfused with *E. coli* HT115 ( $n = 17$ ). b) Body area evolution over time (starting from L4 stage) for N2 worms and *eat-2(ad465)* mutants, measured by optical microscopy (data bars in the graphs express mean  $\pm$  SEM, \*\*\*  $p \leq 0.001$ ,  $n = 17$ ). c) Pharyngeal pumping frequency recorded at Day 1, Day 2 and Day 3 after L4 stage (bar graphs are expressed as mean  $\pm$  SD, \*\*\*  $p \leq 0.001$ ,  $n = 10$ ).

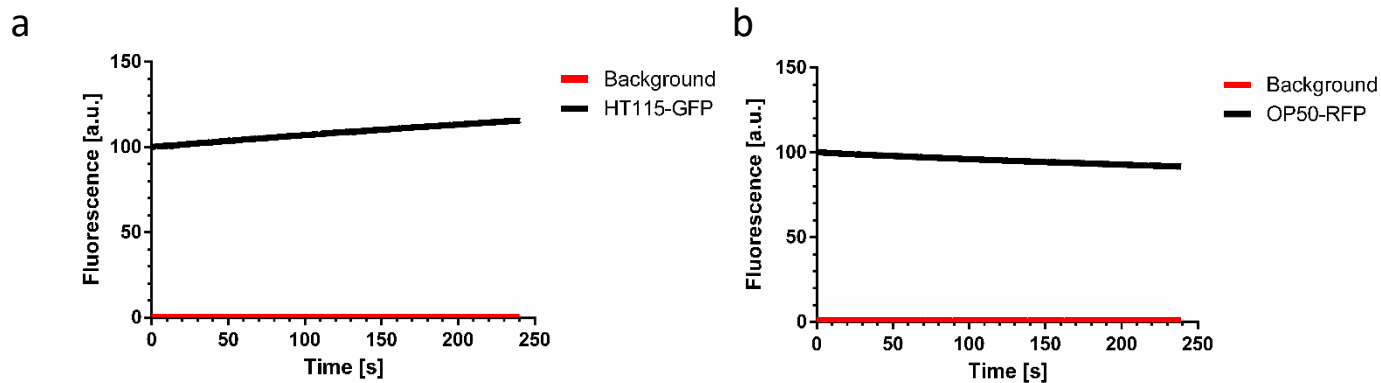

**Fig. S2 (Supplementary).** Monitoring of the fluorescence signal expressed by HT115 GFP (a) and OP50 RFP (b) *E. coli* bacteria in order to assess photo-bleaching of the fluorophores. Frames were acquired for a total duration of 240 s with a sampling interval of 200 ms. Excitation wavelengths selected for HT115 GFP and OP50 RFP *E. coli* bacteria are 488 nm and 545 nm, respectively. Photo-bleaching did not significantly affect the fluorescence signal expressed by the plasmid in both cases. Accordingly, the same parameters were selected to perform bacterial load measurements on worms.

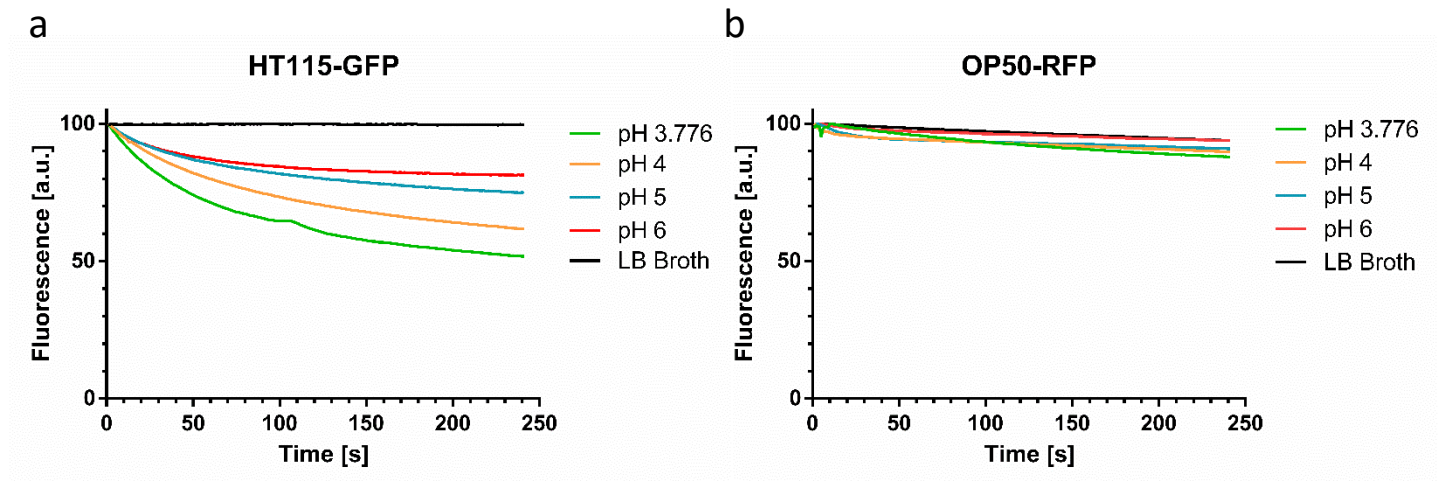

**Fig. S3 (Supplementary).** Monitoring of fluorescence expressed by HT115 GFP (a) and OP50 RFP (b) *E. coli* bacteria suspended in buffer solutions ranging from pH 3.776 to 6 in order to assess the fluorophores sensitivity to pH. 50  $\mu$ l of bacterial suspension was diluted and mixed in 1 ml of buffer solution with known pH value and fluorescence was measured over 240 s. pH values in the intestine of viable *C. elegans* worms ranges from 5.96 in the pharynx to 3.59 in the posterior intestine, buffer solutions pH values were selected accordingly.

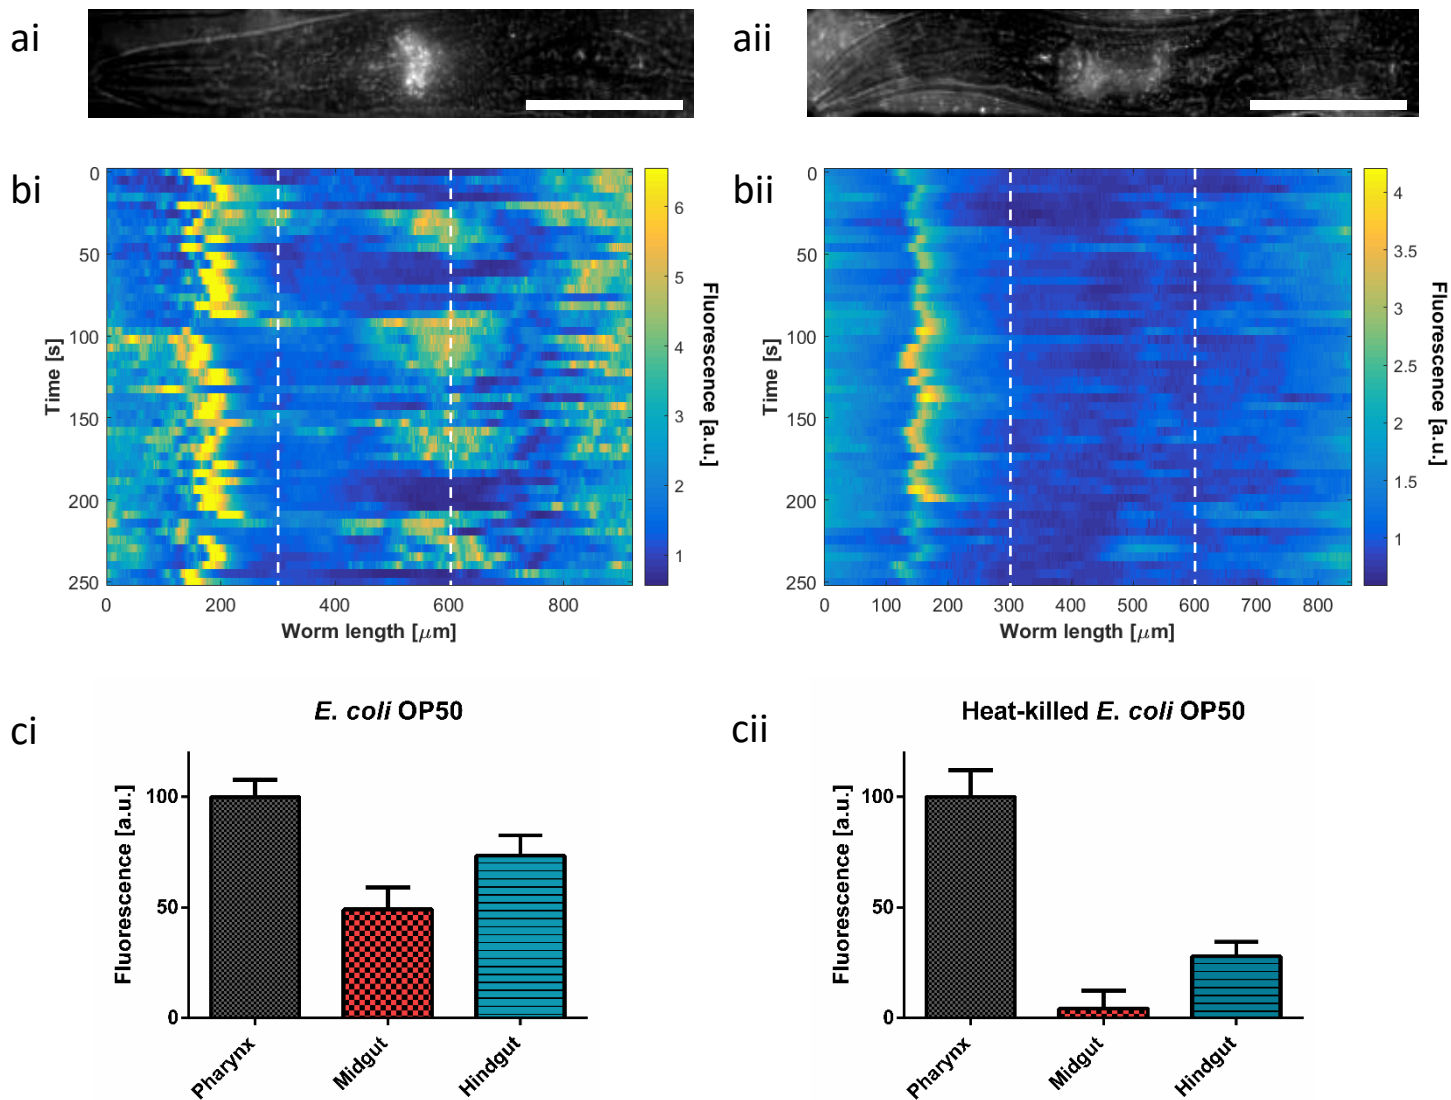

**Fig. S4 (Supplementary).** Analysis of the bacterial load in adult wild-type *C. elegans* worms fed with live and heat-killed *E. coli* OP50 RFP. a) High-resolution brightfield/fluorescence (40x) images of a N2 worm (pharynx) fed with live (ai) and heat-killed (aii) *E. coli* OP50 RFP. Scale bar = 50  $\mu\text{m}$ . b) Time-lapse recordings of the fluorescence intensity in a representative single N2 worm over the whole gut. The worm was fed with live (bi) and heat-killed (bii) *E. coli* OP50 RFP, respectively. Pharynx, midgut and hindgut regions of the worms are delimited by vertical dashed lines in the plots ( $l_{\text{worm}} = 900 \mu\text{m}$ ). c) Bacterial load as measured by fluorescence of the worm gut in adult N2 fed with live (ci) and heat-killed (cii) *E. coli* OP50 RFP. Bars correspond to average fluorescence values measured in the indicated intestine section, normalized with respect the maximum fluorescence value measured in the pharynx. Heat-killed *E. coli* OP50 RFP show a lower persistency in the posterior section of the worms' gut (graphs are expressed as mean  $\pm$  SD,  $n = 10$ ).

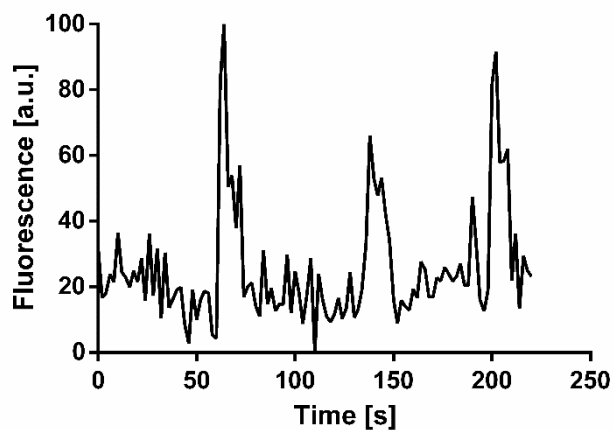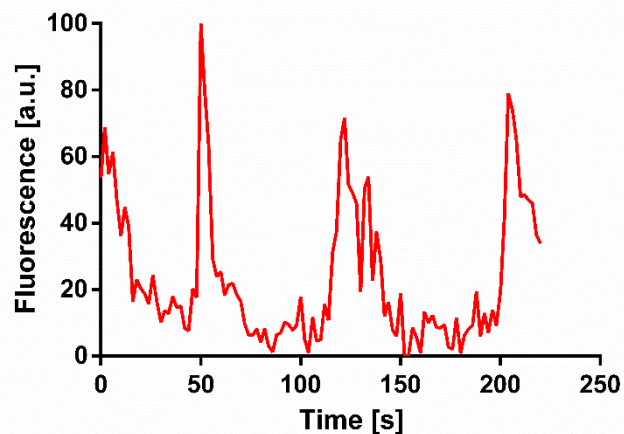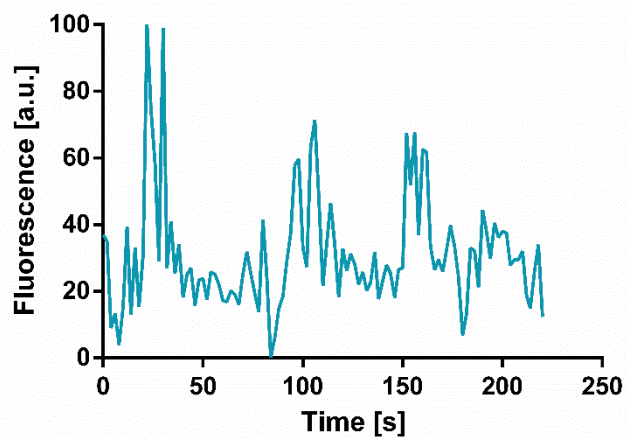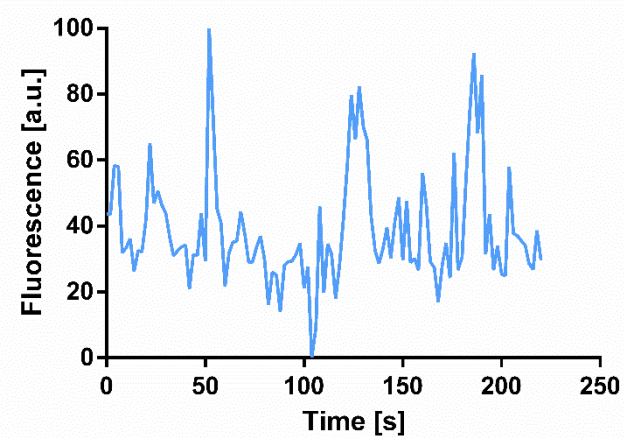

**Fig. S5 (Supplementary).** Average fluorescence signal corresponding to the hindgut region for 4 representative worms fed with *E. coli* HT115 GFP bacteria. The signals have been normalized for analysing the periodicity by Fast Fourier Transform (as shown in Fig. 3).

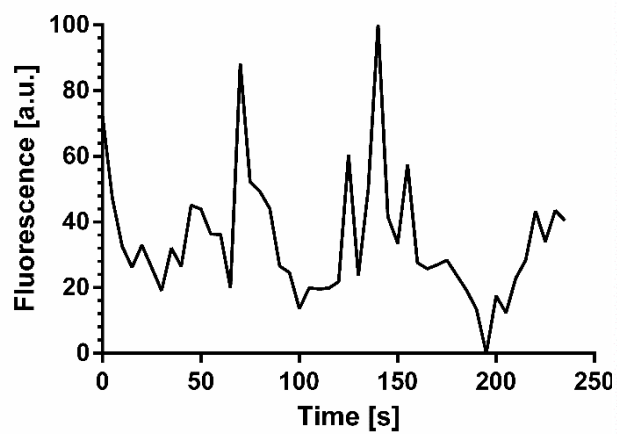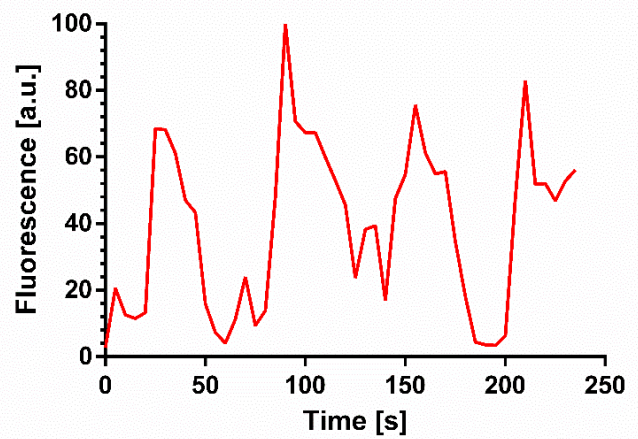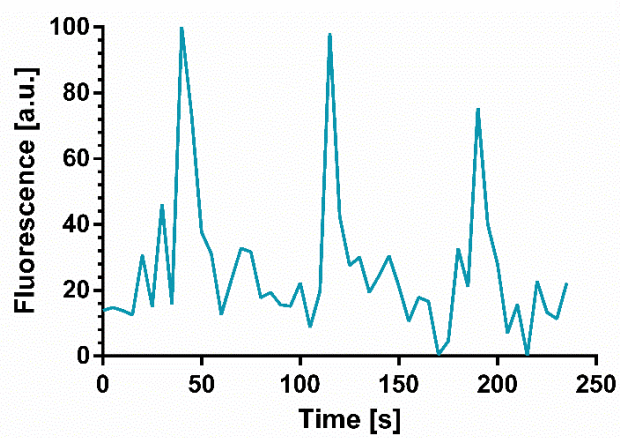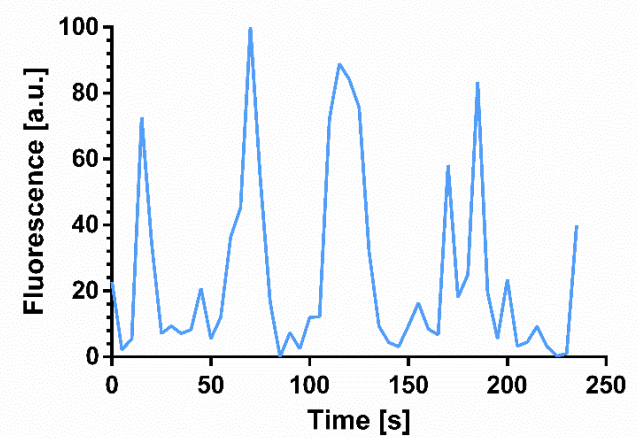

**Fig. S6 (Supplementary).** Average fluorescence signal corresponding to the hindgut region for 4 representative worms fed with *E. coli* OP50 RFP bacteria. The signals have been normalized for analysing the periodicity by Fast Fourier Transform (as shown in Fig. 3).

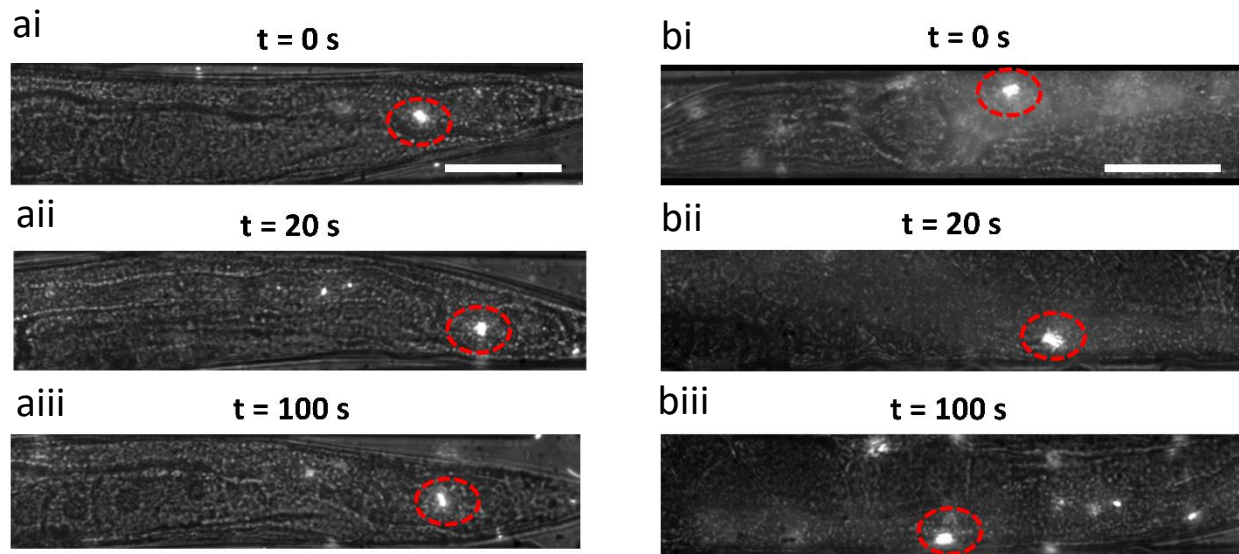

**Fig. S7 (Supplementary).** High-resolution brightfield/fluorescence (40x) time-lapse images of an immobilized N2 *C. elegans* worm fed with *E. coli* HT115 GFP. The image sequences show: (a) a few bacteria persisting in the region of the hindgut and (b) a few bacteria passing through the whole intestinal lumen, in particular the pharynx (bi), the midgut (bii) and the hindgut (biii). Single bacteria are highlighted by red dashed circles. Scale bar = 50  $\mu$ m.
